# Supplementary material
Source: Springer Nature journal article supplement (https://www.springermedizin.de/resource/supplementary/13063_2013_1560_MOESM3_ESM.pdf/9620300)
Supplement: MOESM3 [file 9620300]

## Recruitment

Eligible referral identified at hospital outpatients based on criteria

## Telephone Screen & Patient Mail out

Screen via phone  
With patient permission information sheet with consent form mail or email out

## Patient Consent

Follow up phone call to patient  
Answer questions  
Written consent to be returned via mail or email  
The recruitment log sheet filled & the database entered

## Randomisation

Usual Care (Hospital Diabetes Outpatient Clinic)

Intervention (Community Diabetes Practice)

## Assessment Baseline

Baseline assessments undertaken  
Clinic appointments booked  
Patient Survey

Baseline assessments undertaken  
Clinic appointments booked  
Patient Survey  
Qualitative interview

## Assessment 6 months

Clinical data collection  
Patient Survey

Clinical data collection  
Patient Survey

## Assessment 12 months

Clinical data collection  
Patient Survey

Clinical data collection  
Patient Survey  
Qualitative interview
